# Supplementary material for: MHC Universal Cells Survive in an Allogeneic Environment after Incompatible Transplantation
Source: Hindawi journal article supplement (doi:10.1155/2013/796046), 2013-01-01
Supplement: f1 [file 796046.f1.pdf]

## **Supplementary Material**

Supplementary Table 1. Schematic representation of the shRNA sequences targeting  $\beta 2m$  transcripts

| Name                        | Sequence                   |
|-----------------------------|----------------------------|
| shRNA_1                     | 5' GACCGAGACATGTAATCAA -3' |
| shRNA_2 (RN_sh $\beta 2m$ ) | 5' GGAAAGAAGATACCAAATA -3' |

## **Supplementary Material and Methods**

### **Determination of IgG levels on rat plasma**

Plasma of rat was isolated upon centrifugation (1200g) of peripheral blood collected immediately before transplantation and weekly after transplantation. All samples were frozen at  $-80^{\circ}\text{C}$  until the time of the assay. Rat IgG plasma levels were analysed by ELISA (Genway, San Diego, CA) according to the manufacturer's instructions. Results were acquired in a BioTek synergy microplate reader (Bio Tek, Bad Friedrichshall, Germany).

## **Supplementary Results**

### **Determination of IgG levels on rat plasma**

Levels of IgG detected in plasma sample of animals transplanted with MHC expressing allogeneic cells were significantly higher (e.g. Week 3:  $116.9 \pm 2.9$  mg/ml,  $p < 0.05$ ; Week 8:  $115.8 \pm 4.0$  mg/ml,  $p < 0.01$ ) than IgG levels detected in animal receiving MHC class I-silenced cells (Week 3:  $111.1 \pm 2.3$  mg/ml or Week 8:  $110.3 \pm 0.7$  mg/ml) who did not lose the transplanted cells. The animal who lost the MHC class I-silenced cells at week 7 just showed a slight increase on IgG levels (Week 7: 112.5 mg/ml) in comparison with animal who maintained the grafted cells (Week 7:  $110.9 \pm 1.1$  mg/ml). Levels of IgG were considerably lower in the animals that lost MHC class I silenced cells (Week 7: 112.5 mg/ml) than in animals receiving MHC class I-expressing cells ( $116.9 \pm 2.9$ ) at the time of rejection. (Table S2)

Supplementary Table 2. Rat IgG plasma levels.

| <b>IgG<br/>(mg/ml)</b>                                          | <b>Pre-Tx</b> | <b>Week 1</b> | <b>Week 2</b> | <b>Week 3</b>                       | <b>Week 4</b> | <b>Week 5</b> | <b>Week 6</b> | <b>Week 7</b>                   | <b>Week 8</b> |
|-----------------------------------------------------------------|---------------|---------------|---------------|-------------------------------------|---------------|---------------|---------------|---------------------------------|---------------|
| <b>No rejection<br/>MHC class I silencing<br/>cells (n=4)</b>   | 111.7±0.9     | 110.3±1.9     | 112.2±2.4     | 111.1±2.3                           | 111.2±2.5     | 111.6±0.9     | 111.3±0.6     | 110.9±1.1                       | 110.3±0.7     |
| <b>Rejection<br/>MHC class I silenced<br/>cells (n=1)</b>       | 111.3         | 110.7         | 112.8         | 112.4                               | 112.6         | 112.8         | 112.6         | 112.5<br>(graft not detectable) | 112.7         |
| <b>Rejection<br/>MHC class I<br/>expressing<br/>cells (n=3)</b> | 111.2±0.7     | 112.9±0.2     | 114.1±0.9     | 116.9±2.9<br>(graft not detectable) | 116.7±2.2     | 116.2±2.6     | 115.8±3.3     | 115.9±4.2                       | 115.8±4.0     |
